# Supplementary material for: Predictive Performance of Scoring Systems for Mortality Risk in Patients with Cryptococcemia: An Observational Study
Source: MDPI journal article supplement (doi:10.3390/jpm13091358), 2023-09-06
Supplement: s1 [file s1]

Supplementary: Table S1

Mortality in emergency department sepsis (MEDS) score

| Mortality in emergency department sepsis (MEDS) score | Points |
|-------------------------------------------------------|--------|
| 1. Terminal illness with possible death in 1 month    | 6      |
| 2. Hypoxia or tachypnea                               | 3      |
| 3. Shock from sepsis                                  | 3      |
| 4. Platelet count below 150,000                       | 3      |
| 5. Granulocytic bands >5% of white blood cells        | 3      |
| 6. Patient older than 65 years old                    | 3      |
| 7. Lower respiratory infection                        | 2      |
| 8. Patient is from a nursing home                     | 2      |
| 9. Mental status is altered                           | 2      |

Shapiro, N.I.; Wolfe, R.E.; Moore, R.B.; Smith, E.; Burdick, E.; Bates, D.W. Mortality in emergency department sepsis (MEDS) score: a prospectively derived and validated clinical prediction rule. *Crit. Care Med.* **2003**, *31*, 670-675.

### Rapid Emergency Medicine Score (REMS)

| REMS scoring system            | Score    |                |                  |                  |             |       |     |
|--------------------------------|----------|----------------|------------------|------------------|-------------|-------|-----|
| <i>Variable</i>                | 0        | +1             | +2               | +3               | +4          | +5    | +6  |
| Age (years)                    | <45      |                | 45–54            | 55–64            |             | 65–74 | >74 |
| Mean arterial pressure (mm Hg) | 70–109   |                | 110–129<br>50–69 | 130–159          | >159<br>≤49 |       |     |
| Heart rate (bpm)               | 70–109   |                | 110–139<br>55–69 | 140–179<br>40–54 | >179<br>≤39 |       |     |
| Respiratory rate (breaths/min) | 12–24    | 25–34<br>10–11 | 6–9              | 35–49            | >49<br>≤5   |       |     |
| O <sub>2</sub> saturation (%)  | >89      | 86–89          |                  | 75–85            | <75         |       |     |
| Glasgow Coma Scale             | 14 or 15 | 11–13          | 8–10             | 5–7              | 3 or 4      |       |     |

Olsson, T.; Terent, A.; Lind, L. Rapid Emergency Medicine Score: a new prognostic tool for in-hospital mortality in non-surgical emergency department patients. *J. Intern. Med.* **2004**, *255*, 579–587.

### Modified Early Warning Score

| Points                          | 3          | 2          | 1      | 0         | 1       | 2              | 3             |
|---------------------------------|------------|------------|--------|-----------|---------|----------------|---------------|
| Temperature (°C)                |            | 35 or less |        | 35.1–38.4 |         | 38.5 or higher |               |
| Heart rate (bpm)                |            | 39 or less | 40–50  | 51–100    | 101–110 | 111–129        | 130 or higher |
| Systolic blood pressure (mm Hg) | 70 or less | 71–80      | 81–100 | 101–199   |         | 200 or higher  |               |
| Respiratory rate                |            | 8 or less  | 9      | 10–18     | 19–20   | 21–29          | 30 or higher  |
| AVPU score                      |            |            |        | A         | V       | P              | U             |

Subbe, C.P.; Kruger, M.; Rutherford, P.; Gemmel, L. Validation of a modified Early Warning Score in medical admissions. *QJM : monthly journal of the Association of Physicians*, **2001**, 94, 521-526.

Rapid Acute Physiology Score (RAPS) scoring system.

| Variable   | 0      | +1    | +2      | +3      | +4   |
|------------|--------|-------|---------|---------|------|
| PR (/min)  | 70–109 |       | 55–69   | 40–54   | ≤39  |
|            |        |       | 110–139 | 140–179 | ≥180 |
| MAP (mmHg) | 70–109 |       | 50–69   | 130–159 | ≤49  |
|            |        |       | 110–129 |         | ≥160 |
| RR (/min)  | 12–24  | 10–11 | 6–9     | 35–49   | ≤5   |
|            |        | 25–34 |         |         | ≥50  |
| GCS        | ≥14    | 11–13 | 8–10    | 5–7     | ≤4   |

PR, pulse rate; MAP, mean arterial pressure; RR, respiratory rate; GCS, Glasgow Coma Scale.

Goodacre, S.; Turner, J.; Nicholl, J. Prediction of mortality among emergency medical admissions. *Emerg. Med. J.* **2006**, *23*, 372–375.

quick sequential organ failure assessment (qSOFA)

|                               | point |
|-------------------------------|-------|
| Respiratory Rate > 22         | 1     |
| Systolic Blood Pressure < 100 | 1     |
| Glasgow Coma Scale <14        | 1     |

April, M.D.; Aguirre, J.; Tannenbaum, L.I.; Moore, T.; Pingree, A.; Thaxton, R.E.; Sessions, D.J.; Lantry, J.H. Sepsis clinical criteria in emergency department patients admitted to an intensive care unit: an external validation study of quick Sequential Organ Failure Assessment. *J. Emerg. Med.* **2017**, *52*, 622–631.

### National Early Warning Score (NEWS)

| Physiological parameters                     | 3     | 2      | 1         | 0         | 1         | 2       | 3         |
|----------------------------------------------|-------|--------|-----------|-----------|-----------|---------|-----------|
| Respiration Rate (breaths per minute)        | ≤8    |        | 9–11      | 12–20     |           | 21–24   | ≥25       |
| SpO <sub>2</sub> (%)                         | ≤91   | 92–93  | 94–95     | ≥96       |           |         |           |
| Any supplemental oxygen?                     |       | Yes    |           | No        |           |         |           |
| Temperature (°C)                             | ≤35.0 |        | 35.1–36.0 | 36.1–38.0 | 38.1–39.0 | ≥39.1   |           |
| Systolic BP (mmHg)                           | ≤90   | 91–100 | 101–110   | 111–219   |           |         | ≥220      |
| Heart/pulse rate (beats per minute)          | ≤40   |        | 41–50     | 51–90     | 91–110    | 111–130 | ≥131      |
| Level of consciousness using the AVPU system |       |        |           | A         |           |         | V, P or U |

Smith, G.B.; Prytherch, D.R.; Meredith, P.; Schmidt, P.E.; Featherstone, P.I. The ability of the National Early Warning Score (NEWS) to discriminate patients at risk of early cardiac arrest, unanticipated intensive care unit admission, and death. *Resuscitation*. 2013, 84, 465-470.

### Worthing physiological scoring system

|                          | Score  |           |           |       |
|--------------------------|--------|-----------|-----------|-------|
|                          | 0      | 1         | 2         | 3     |
| Ventilatory frequency    | ≤19    | 20–21     | ≥22       |       |
| Pulse                    | ≤101   | ≥102      |           |       |
| Systolic blood pressure  | ≥100   |           | ≤99       |       |
| Temperature              | ≥35.3  |           |           | <35.3 |
| Oxygen saturation in air | 96–100 | 94 to <96 | 92 to <94 | <92   |
| AVPU                     | Alert  |           |           | Other |

Duckitt, R.W.; Buxton-Thomas, R.; Walker, J.; Cheek, E.; Bewick, V.; Venn, R.; Forni, L.G. Worthing physiological scoring system: derivation and validation of a physiological early-warning system for medical admissions. An observational, population-based single-centre study. *Br. J. Anaesth.* **2007**, *98*, 769-774.

### Glasgow coma scale, age, and arterial blood pressure score

| Variable/score          | 0   | +1               | +3  | +4     | +6   |
|-------------------------|-----|------------------|-----|--------|------|
| Glasgow Coma Scale      |     | 1 points per GCS |     |        |      |
| Age                     | ≥60 |                  | <60 |        |      |
| Systolic blood pressure | <60 |                  |     | 60-120 | >120 |

Higher points denotes better outcome in this case, out of a possible 24 points.
